# Supplementary material
Source: PubMed Central journal article supplement (PMC3246666)
Supplement: bph0164-2042-SD1.pdf [file bph0164-2042-SD1.pdf]

## Supplementary materials and methods

### *Measurement of Cell Apoptosis*

For Annexin V-PE assay, the Annexin V-PE Apoptosis Detection Kit (BD PharMingen, San Diego, CA) was used. Apoptotic cells were detected by annexin V binding to phospholipid phosphatidylserine (PS), which was translocated from the inner to the outer leaflet of the plasma membrane of apoptotic cells. Approximately  $1 \times 10^6$  cells were resuspended in  $1 \times$ binding buffer and incubated with phycoerythrin (PE)-conjugated annexin V and the fluorescent DNA-binding dye 7-AAD in the dark for 15 min at room temperature. The cells were then quantified by FACS analysis.

## Supplementary Figures

Figure S1

Mean fluorescence intensity of CD markers of DCs

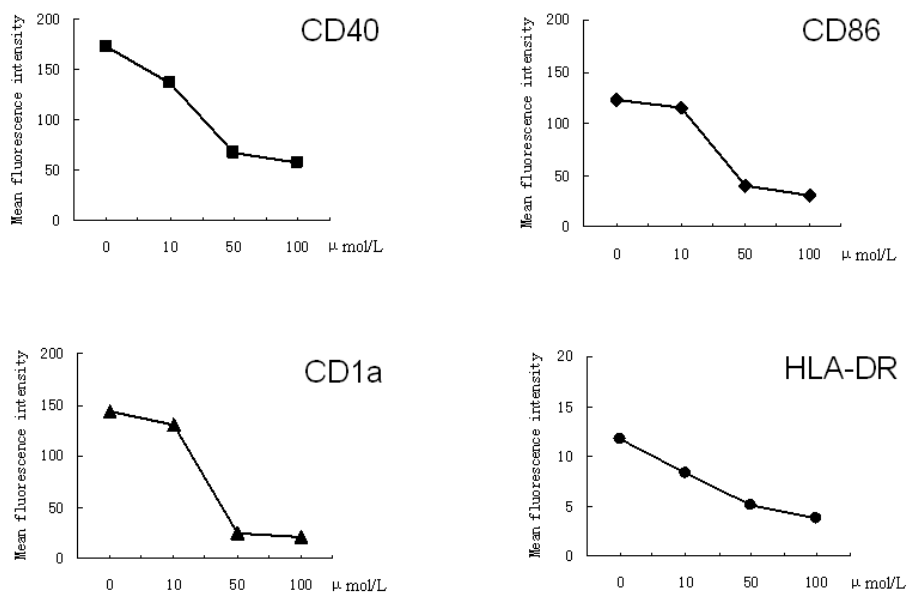

**Figure S1** Concentration curves for the effect of Sal B on DCs maturation.

Ox-LDL-induced DCs were treated with 0, 10, 50, and 100  $\mu\text{M}$  of Sal B, and the phenotypic changes of CD40, CD86, CD1a, and HLA-DR were determined, respectively.

Figure S2

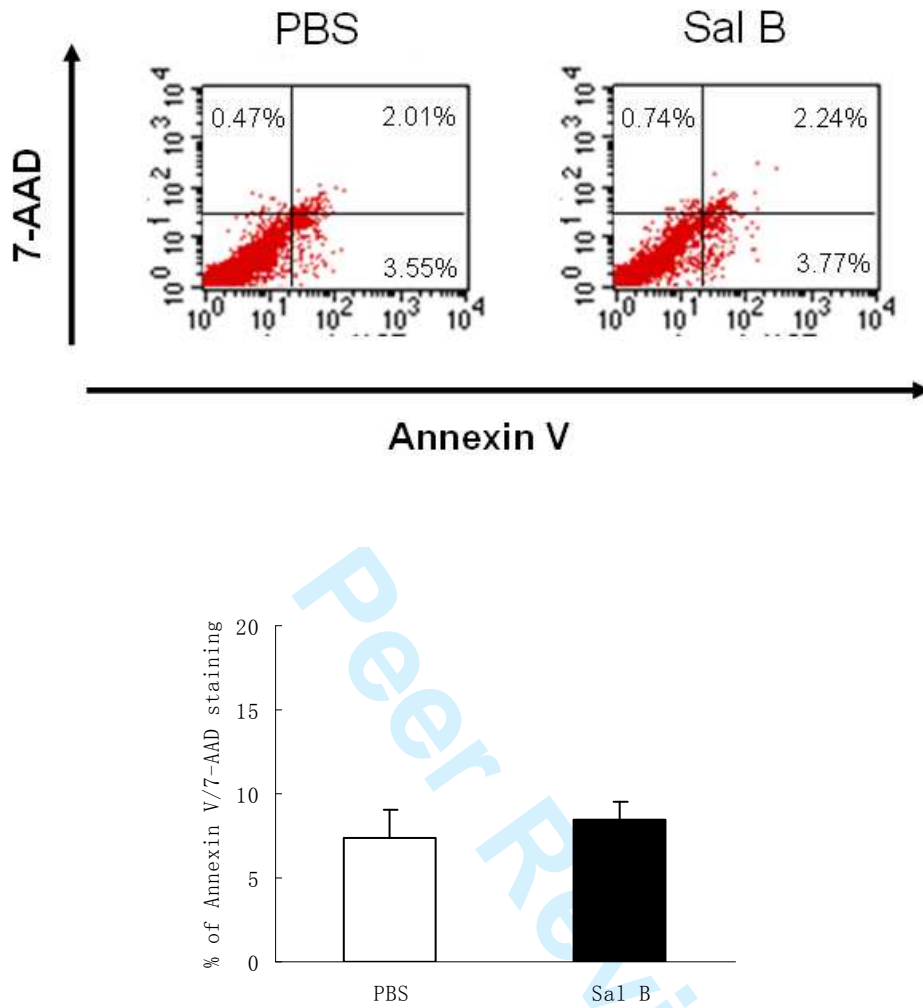

**Figure S2** PBMCs were separated and purified with anti-CD14 magnetic beads, then cultured with GM-CSF (100 ng/ml) and IL-4 (40 ng/ml) for 5 days. On day 6, cells were stimulated by Sal B (50 $\mu$ M) and the toxic effects of Sal B were then quantified by FACS analysis after staining with Annexin V and 7-AAD. The results represented the means $\pm$ SD of three independent experiments.

Figure S3

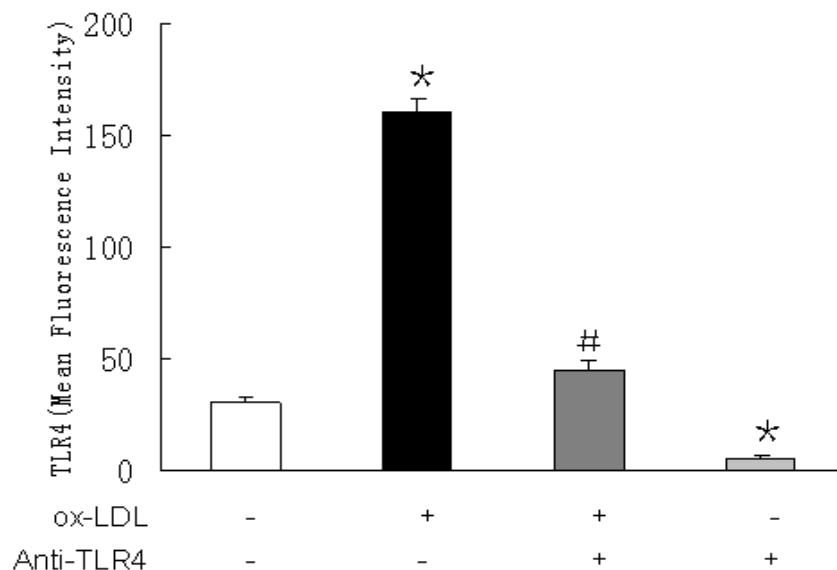

**Figure S3** Purified h-monDC was incubated for 5 days in the presence of GM-CSF and IL-4. On day 6, ox-LDL (50 $\mu$ g/ml) was added and the effect of ox-LDL-induced TLR4 expression was determined by FACS after blocking the membrane TLR4 on matured h-monDC by purified TLR4 neutralizing antibody. Data were presented as means $\pm$ SD for three times of independent experiments. \* $P$ <0.05 vs. control; #  $P$ <0.05 vs. ox-LDL.

Figure S4

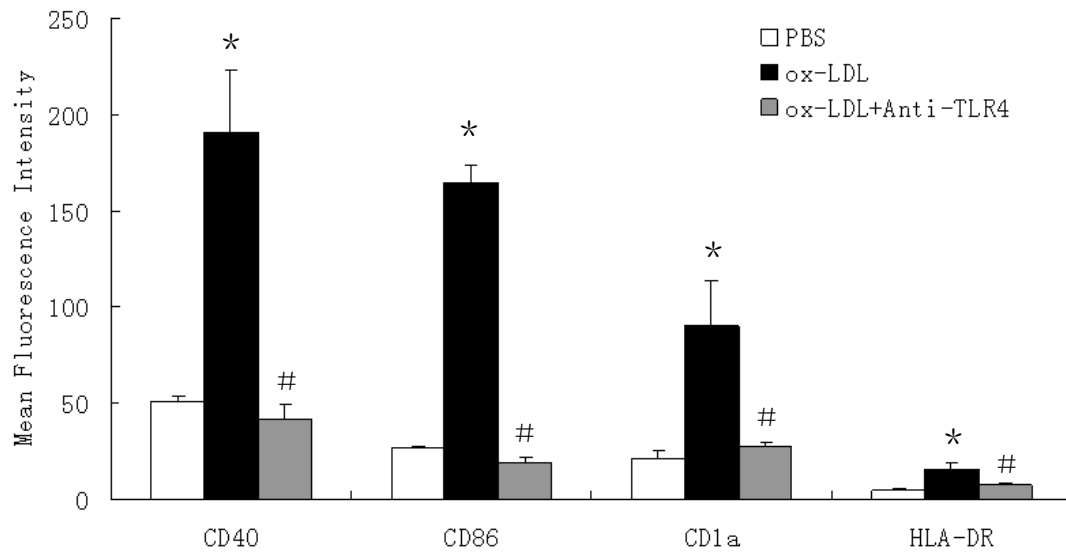

**Figure S4** Purified h-monDC was incubated for 5 days in the presence of GM-CSF and IL-4. On day 6, ox-LDL (50 $\mu$ g/ml) was added and the effect of ox-LDL-induced h-monDC phenotype was determined by FACS after blocking the membrane TLR4 on matured h-monDC by purified TLR4 neutralizing antibody. Data were presented as means $\pm$ SD for three times of independent experiments. \* $P < 0.05$  vs. PBS; #  $P < 0.05$  vs. ox-LDL.

Figure S5

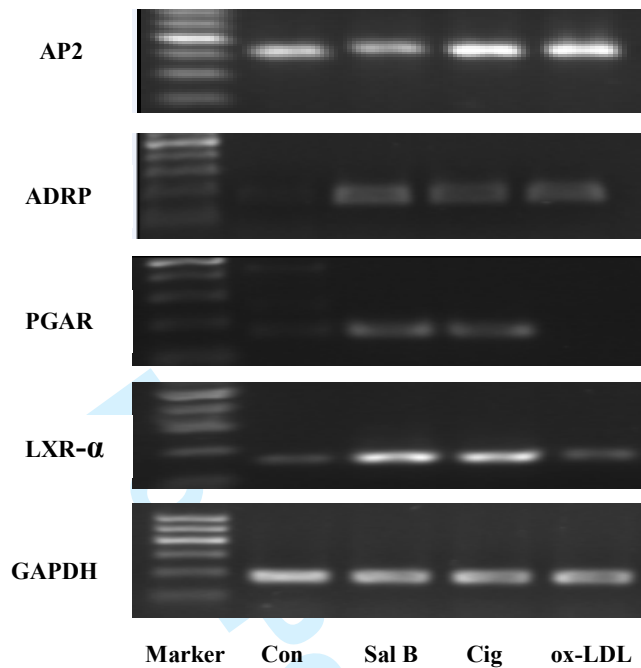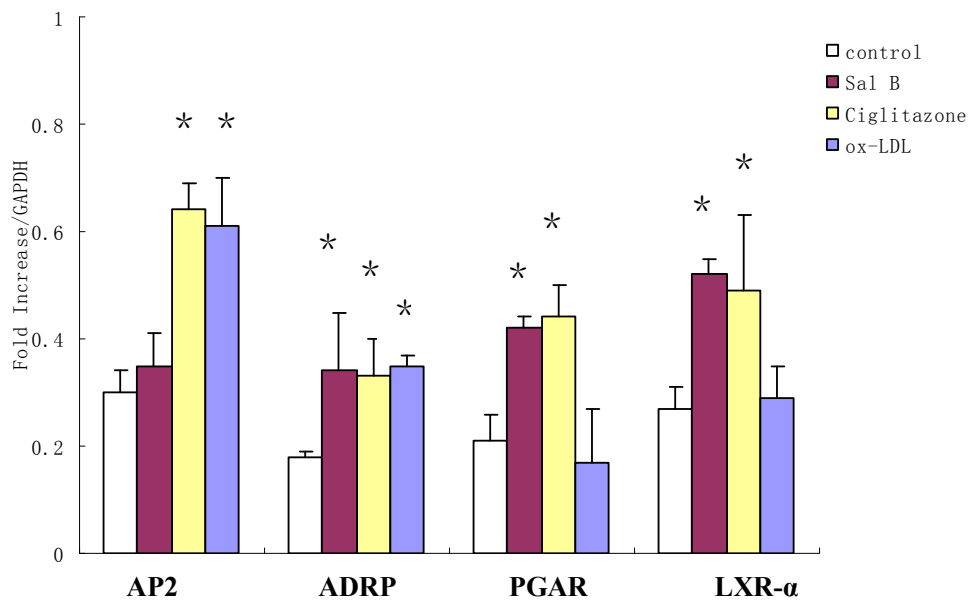

1  
2  
3  
4 **Figure S5** PBMCs derived h-monDC cultured with GM-CSF and IL-4 for 5 days,  
5  
6 then stimulated by PBS, Sal B, Ciglitazone and ox-LDL, respectively for 24 h. Then  
7  
8 mRNA was extracted and cDNA was reverse-transcribed. The expression of PPAR- $\gamma$   
9  
10 target genes were analyzed by RT-PCR using specific primers as follows: LXR- $\alpha$ ,  
11  
12 5'-acggtgatgcttctggagac-3' and 5'-tagcaatgagcaaggcaaact-3' (NM\_001130101.1);  
13  
14 AP-2, 5'-gtctccgcatccctattaac-3' and 5'-ggaatggtgctcggtgagaaa-3'  
15  
16 (NM\_001032280.2); ADRP, 5'-agtggaaaaggagcattggata-3' and  
17  
18 5'-ctgtggtacacctggatgttg-3' (NM\_001122.3); PGAR, 5'-acaagcacctagaccatgaggt-3'  
19  
20 and 5'-ctgaattactgtccagcctccat-3' (NM\_001039667.1); GAPDH,  
21  
22 5'-agaaggctggggctcattg-3' and 5'-aggggccatccacagtcttc-3' (NM\_002046.3).  
23  
24  
25  
26  
27  
28  
29  
30  
31 (\* P<0.05, vs control.)  
32  
33  
34  
35  
36  
37  
38  
39  
40  
41  
42  
43  
44  
45  
46  
47  
48  
49  
50  
51  
52  
53  
54  
55  
56  
57  
58  
59  
60

**Figure S6**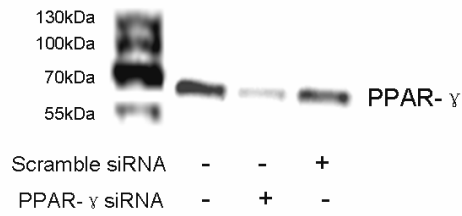

**Figure S6** PBMCs derived h-monDC cultured with GM-CSF and IL-4 for 5 days, then cells were transfected with mock conditions (no siRNA), PPAR- $\gamma$  siRNA, or scramble siRNA for 24 h, respectively.
